# Supplementary material for: The Influence of the Omicron Variant on RNA Extraction and RT-qPCR Detection of SARS-CoV-2 in a Laboratory in Brazil
Source: MDPI journal article supplement (doi:10.3390/v15081690), 2023-08-04
Supplement: s1 [file s1]

## Supplementary Material

# The Influence of the Omicron Variant on RNA Extraction and RT-qPCR Detection of SARS-CoV-2 in a Laboratory in Brazil

Lívia Mara Silva <sup>1</sup>, Lorena Rodrigues Riani <sup>1</sup>, Juliana Brovini Leite <sup>1</sup>, Jessica Mara de Assis Chagas <sup>1</sup>, Laura Silva Fernandes <sup>1</sup>, Romário Costa Fochat <sup>1</sup>, Carmen Gomide Pinto Perches <sup>2</sup>, Thiago César Nascimento <sup>3</sup>, Lauren Hubert Jaeger <sup>1</sup>, Marcelo Silva Silvério <sup>1</sup>, Olavo dos Santos Pereira-Júnior <sup>1</sup> and Frederico Pittella <sup>1,\*</sup>

<sup>1</sup> Faculdade de Farmácia, Universidade Federal de Juiz de Fora, Rua José Lourenço Kelmer, s/n–Campus Universitário, Juiz de Fora 36036-900, MG, Brazil

<sup>2</sup> Hospital Universitário, Universidade Federal de Juiz de Fora, Av. Eugênio do Nascimento, s/n, Juiz de Fora 36038-330, MG, Brazil

<sup>3</sup> Faculdade de Enfermagem, Universidade Federal de Juiz de Fora, Rua José Lourenço Kelmer, s/n–Campus Universitário, Juiz de Fora 36036-900, MG, Brazil

\* Correspondence: frederico.pittella@ufjf.br; Tel.: +55-32-2102-3803

## Results

Initially, we evaluated the optimal dilution ratio to improve amplification and achieve better results in the sample's RT-qPCR assay. By using a pre-dilution of viscous samples, we successfully restored the amplification of the control gene. The results indicated no significant difference between the dilutions (1:1; 1:2 and 1:3) for the detection of positive samples, suggesting that any dilution is effective and provides better results compared to analyzing the sample without dilution (Fig. S1A–S1D). The dilution recommended was the ratio 1:2, as it minimizes the residual interference of PCR and fluorescence inhibitors, resulting in a better amplification signal.

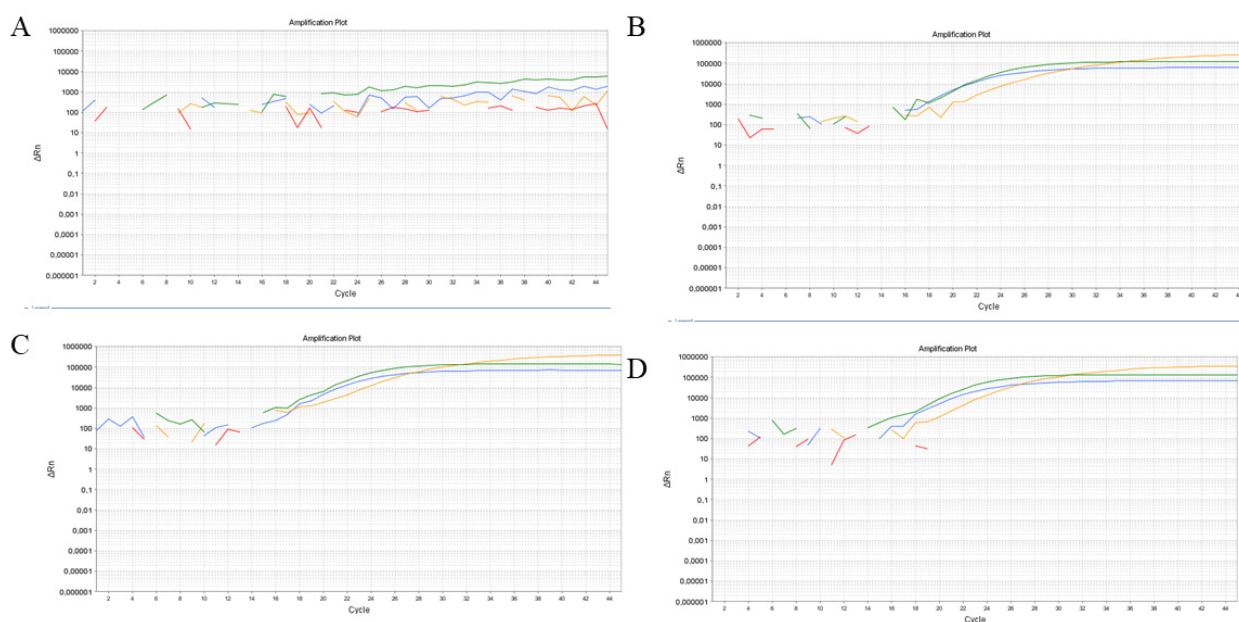

**Figure S1.** Amplification of positive sample containing SARS-CoV-2 by RT-qPCR, from samples collected in January 2022 and analyzed using Allplex kit. A) Amplification of the sample without dilution. B) Sample amplification after 1:1 dilution. C) Sample amplification after 1:2 dilution (1 sample: 2 saline). D) Sample amplification after 1:3 dilution (1 sample: 3 saline).

All samples collected from August to December 2021 exhibited the presence of different genes, indicating that they corresponded to the Beta, Gamma or other variants not identified by the kit, such as Delta. However, all samples collected in January 2022, which initially yielded inconclusive results in the tests before the dilution process, exhibited amplification for the HV69/70del and N501Y mutation, confirming that they indeed corresponded to the Omicron variant. The individual results of probable variants, as well as the CT of the analyzed targets, are presented in Table S1.

**Table S1.** Results obtained in the analysis of SARS-Cov-2 variants.

| Period       | Sample ID | Genes (CT) |       |       |             | Probable variant |
|--------------|-----------|------------|-------|-------|-------------|------------------|
|              |           | E484K      | RdRP  | N501Y | HV69/70 del |                  |
| Pre-Omicron  | 1         | -          | 22.93 | -     | -           | Delta            |
|              | 2         | 27.18      | 20.95 | 26.32 | -           | Beta or Gamma    |
|              | 3         | 30.52      | 25.98 | 31.48 | -           | Beta or Gamma    |
|              | 4         | 31.94      | 29.52 | 33.23 | -           | Beta or Gamma    |
|              | 5         | 31.97      | 28.74 | 28.54 | -           | Beta or Gamma    |
|              | 6         | -          | 26.94 | -     | -           | Delta            |
|              | 7         | -          | 27.85 | -     | -           | Delta            |
|              | 8         | -          | 27.45 | -     | -           | Delta            |
|              | 9         | -          | 21.59 | -     | -           | Delta            |
|              | 10        | -          | 19.61 | -     | -           | Delta            |
|              | 11        | -          | 24.06 | -     | -           | Delta            |
|              | 12        | -          | 27.30 | -     | -           | Delta            |
|              | 13        | -          | 22.47 | -     | -           | Delta            |
|              | 14        | -          | 36.22 | -     | -           | Delta            |
|              | 15        | -          | 32.57 | -     | -           | Delta            |
|              | 16        | -          | 31.31 | -     | -           | Delta            |
|              | 17        | 29.80      | 31.50 | 30.27 | -           | Beta or Gamma    |
|              | 18        | -          | 25.95 | -     | -           | Delta            |
|              | 19        | -          | 30.71 | -     | -           | Delta            |
|              | 20        | -          | 23.60 | -     | -           | Delta            |
|              | 21        | -          | 23.45 | -     | -           | Delta            |
|              | 22        | -          | 20.61 | -     | -           | Delta            |
|              | 23        | 39.40      | 39.28 | 31.57 | -           | Beta or Gamma    |
|              | 24        | -          | 22.77 | -     | -           | Delta            |
|              | 25        | -          | 29,08 | -     | -           | Delta            |
| Omicron Peak | 26        | -          | 37.73 | 31.85 | 30.64       | Omicron          |
|              | 27        | -          | 39.11 | 35.57 | 32.58       | Omicron          |
|              | 28        | -          | 37.22 | 33.96 | 30.49       | Omicron          |
|              | 29        | -          | 25.49 | 27.13 | 23.61       | Omicron          |
|              | 30        | -          | 22.13 | 22.60 | 19.02       | Omicron          |
|              | 31        | -          | 25.98 | 26.92 | 23.16       | Omicron          |

|  |    |   |       |       |       |         |
|--|----|---|-------|-------|-------|---------|
|  | 32 | - | 26.26 | 25.64 | 23.48 | Omicron |
|  | 33 | - | 29.83 | 28.28 | 25.75 | Omicron |
|  | 34 | - | 27.39 | 26.72 | 23.87 | Omicron |
|  | 35 | - | 28.74 | 26.76 | 26.81 | Omicron |
|  | 36 | - | 24.15 | 24.69 | 21.49 | Omicron |
|  | 37 | - | 30.63 | 29.50 | 27.10 | Omicron |
|  | 38 | - | 26.12 | 25.82 | 22.76 | Omicron |
|  | 39 | - | 29.15 | 29.07 | 25.99 | Omicron |
|  | 40 | - | 32.65 | 30.58 | 27.78 | Omicron |
|  | 41 | - | 25.41 | 23.89 | 24.06 | Omicron |
|  | 42 | - | 27.00 | 27.90 | 25.02 | Omicron |
|  | 43 | - | 36.81 | 35.00 | 31.70 | Omicron |
|  | 44 | - | 28.00 | 26.54 | 23.99 | Omicron |
|  | 45 | - | 25.29 | 25.39 | 22.36 | Omicron |
|  | 46 | - | 31.74 | 29.05 | 33.78 | Omicron |
|  | 47 | - | 27.42 | 28.92 | 26.36 | Omicron |
|  | 48 | - | 22.77 | 23.93 | 20.46 | Omicron |
|  | 49 | - | 35.53 | 34.78 | 31.52 | Omicron |
|  | 50 | - | 26.53 | 28.23 | 25.17 | Omicron |
